## ACKNOWLEDGMENT

The Editor-in-Chief and the Editors of ANESTHESIOLOGY would like to thank the following individuals for their participation in the editorial review process. Their contribution is sincerely appreciated.

- Basem B. Abdelmalak, M.D.  
John P. Abenstein, M.D.  
Jacques H. Abraini, Ph.D., D.Sc.,  
Psy.D.  
Anthony Absalom, M.B., Ch.B.,  
F.R.C.A., M.D.  
Ozan Akca, M.D.  
Michael T. Alkire, M.D.  
Paul D. Allen, M.D., Ph.D.  
Dean B. Andropoulos, M.D.  
Martin S. Angst, M.D.  
David M. Ansley, M.D.  
Bernd Antkowiak, Ph.D.  
Christian C. Apfel, M.D., Ph.D.  
David P. Archer, M.D.  
William M. Armstead, Ph.D.  
Takashi Asai, M.D., Ph.D.  
Karim Asehnoune, M.D., Ph.D.  
Frederic Aubrun, M.D., Ph.D.  
John George Augoustides, M.D.,  
F.A.S.E.  
Michael S. Avidan, M.B., B.Ch.,  
F.C.A.  
Takao Ayuse, D.D.S., Ph.D.  
Angela M. Bader, M.D., M.P.H.  
Aranya Bagchi, M.D.  
James M. Bailey, M.D., Ph.D.  
Christophe Baillard, M.D., Ph.D.  
Ednan K. Bajwa, M.D.  
Steven J. Barker, Ph.D., M.D.  
Michel Barrot, Ph.D.  
Brian Thomas Bateman, M.D.  
Victor C. Baum, M.D.  
Jan H. Baumert, M.D., Ph.D.,  
D.E.A.A.  
W. Scott Beattie, M.D., Ph.D.,  
F.R.C.P.C.  
Marc Beaussier, M.D., Ph.D.  
Beatrice Beck-Schimmer, M.D.  
Berthold Bein, M.D., D.E.A.A.  
Alex Bekker, M.D., Ph.D.  
Dan Benhamou, M.D.  
Helene Benveniste, M.D., Ph.D.  
Honorio T. Benzoni, M.D.  
Charles B. Berde, M.D., Ph.D.  
Mitchell F. Berman, M.D., M.P.H.  
Nacim Betrouni, M.D.  
Matthieu Biais, M.D.  
Philip E. Bickler, M.D., Ph.D.  
Martin W. Bienengraeber, Ph.D.  
Luca M. Bigatello, M.D.  
Valerie Billard, M.D.  
James Lawson Blair, D.O.  
Kenneth D. Bloch, M.D.  
James M. Blum, M.D.  
Mélanie Boly, M.D., Ph.D.  
Zeljko J. Bosnjak, Ph.D.  
Ansgar M. Brambrink, M.D., Ph.D.  
Gary Jay Brenner, M.D., Ph.D.  
Robert H. Brown, M.D., M.P.H.  
Karen A. Brown, M.D.  
David L. Brown, M.D.  
Robert Douglas Bruce, M.D.  
Jorgen Bruhn, M.D., Ph.D.  
Chad Michael Brummett, M.D.  
Timothy G. Buchman, Ph.D., M.D.  
Donal J. Buggy, M.D., M.Sc., D.M.E.,  
F.R.C.P.I., F.C.A.I., F.R.C.A.  
James E. Caldwell, M.B., Ch.B.  
Frederic Camu, M.D., Ph.D.  
Maxime Cannesson, M.D., Ph.D.  
Xavier Capdevila, M.D., Ph.D.  
Franco Carli, M.D., M.Phil.  
Ian Richard Carroll, M.D., M.S.  
Brian A. Cason, M.D.  
Davide Cattano, M.D., Ph.D.  
Uta Ceglarek, Ph.D.  
Vincent W. S. Chan, M.D.  
Wei Chao, M.D., Ph.D.  
Daniel Chappell, M.D.  
Thierry Chazot, M.D.  
Jacques E. Chelly, M.D., Ph.D.,  
M.B.A.  
Wanqiu Chen, Ph.D.  
Joanna Chikwe, M.D.  
ShiNung Ching, Ph.D.  
Kerry C. Cho, M.D.  
Bernard P. Cholley, M.D., Ph.D.  
Kyungsoon Chung, Ph.D.  
J. David Clark, M.D., Ph.D.  
Edmond Cohen, M.D.  
Steven Paul Cohen, M.D.  
Catherine Coirault, M.D., Ph.D.  
Daniel J. Cole, M.D.  
Xavier Combes, M.D.  
Peter F. Conzen, M.D., Ph.D.  
Tim M. Cook, M.B.B.S., B.A.,  
F.R.C.A.  
Jeffrey B. Cooper, Ph.D.  
Richard M. Cooper, M.D., F.R.C.P.C.  
Pierre Coriat, M.D.  
Francesco Corradi, Ph.D., M.D.  
Michael Costigan, Ph.D.  
Joseph F. Cotton, M.D., Ph.D.  
Joseph Peter Cravero, M.D.  
Gregory Crosby, M.D.  
Edward T. Crosby, M.D., F.R.C.P.C.,  
F.A.A.P.  
C. Michael Crowder, M.D., Ph.D.  
George J. Crystal, Ph.D.  
Deborah J. Culley, M.D.  
Cynthia Czajkowski, Ph.D.  
Michael N. D'Ambra, M.D.  
Albert Dahan, M.D., Ph.D.  
Souhayl Dahmani, M.D., Ph.D.  
Daniel De Backer, M.D.  
Jan De Witte, M.D.  
Laura S. Dean, M.D.  
Win-Ping Deng, Ph.D.  
Stuart W. Derbyshire, Ph.D.  
George Despotis, M.D.  
Clifford S. Deutschman, M.S., M.D.  
Lakshmi A. Devi, Ph.D.  
Franklin Dexter, M.D., Ph.D.  
Gilles Dhonneur, M.D., Ph.D.  
Anthony H. Dickenson, B.Sc., Ph.D.  
Wulf Dietrich, M.D., Ph.D.  
Michael N. Diringier, M.D.  
Francois Donati, Ph.D., M.D.,  
F.R.C.P.C.  
Patrick M. Dougherty, Ph.D.  
Stefan Dröse, M.D.  
Tomas Drabek, M.D.  
John C. Drummond, M.D.,  
F.R.C.P.C.  
Guy Dumont, M.D.  
Andra E. Duncan, M.D.  
Richard P. Dutton, M.D.  
Chin B. Eap, Ph.D.  
Roderic G. Eckenhoff, M.D.  
David M. Eckmann, Ph.D., M.D.  
Jesse M. Ehrenfeld, M.D.  
Helge Eilers, M.D.  
Mohammad I. El-Orbany, M.D.  
John E. Ellis, M.D.  
Holger K. Eltzschig, M.D., Ph.D.  
Lars I. Eriksson, M.D., Ph.D.  
Jean-Pierre Christian Estebe, M.D.,  
Ph.D.  
Alex S. Evers, M.D.  
Lisa W. Faberowski, M.D.  
Carolyn A. Fairbanks, Ph.D.  
John R. Feiner, M.D.  
Jean-Luc Fellahi, M.D., Ph.D.  
Roger B. Fillingim, Ph.D.  
Heidrun Fink, M.D.  
Dennis M. Fisher, M.D.  
Lee A. Fleisher, M.D.  
Vincenzo Fodale, M.D.  
Pierre Foex, M.D.  
Stuart A. Forman, M.D., Ph.D.  
Amanda A. Fox, M.D.  
Aaron Peter Fox, Ph.D.  
Gyorgy Frenzl, M.D.  
Patrick Friederich, M.D.  
Eugene S. Fu, M.D.  
Yoshitaka Fujii, M.D.  
Robert R. Gaiser, M.D.  
Marcelo Gama de Abreu, M.D., M.Sc.,  
Ph.D., D.E.A.A.  
Tong J. Gan, M.B., F.R.C.A.,  
F.F.A.R.C.S.(I)  
Arjunan Ganesh, M.D.  
Steven Gayer, M.D., M.B.A.  
Adrian W. Gelb, M.B.Ch.B.,  
F.R.C.P.C.  
Simon Gelman, M.D.  
Peter Gerner, M.D.  
Pietro Ghezzi, Ph.D.  
Ian Gilron, M.D., M.Sc., F.R.C.P.C.  
Tony Gin, M.D.  
Kevin Jan Gingrich, M.D.  
Thierry Girard, M.D.  
Mark Gladwin, M.D.  
David Brian Glick, M.D., M.B.A.  
Michael S. Gold, Ph.D.  
Peter Goldstein, M.D.  
Michal Granot, Ph.D.  
A. Richard Green, Ph.D., D.Sc.

- Keith Greenland, M.B.B.S., M.D.,  
F.A.N.Z.C.A., F.H.K.A.M.  
Hilary Peter Grocott, M.D.,  
F.R.C.P.C.  
Michael A. Gropper, M.D., Ph.D.  
Jeffrey B. Gross, M.D.  
Ulf Guenther, M.D.  
Anil Gupta, M.D., F.R.C.A., Ph.D.  
Dhanesh Kumar Gupta, M.D.  
Kalpna Gupta, Ph.D.  
Howard B. Gutstein, M.D.  
Admir Hadzic, Ph.D., M.D.  
Carin Ann Hagberg, M.D.  
Robert G. Hahn, M.D., Ph.D.  
Guy S. Haller, M.D., Ph.D.  
James E. Heavner, D.V.M., Ph.D.  
James R. Hebl, M.D.  
Paul M. Heerd, M.D., Ph.D.  
Judith Hellman, M.D.  
Thomas M. Hemmerling, M.D.,  
M.Sc., D.E.A.A.  
J. Claude Hemphill, M.D., M.A.S.  
Jan F. A. Hendrickx, M.D., Ph.D.  
Dietrich Henzler, M.D., Ph.D.  
David L. Hepner, M.D.  
Dean Hess, Ph.D., R.R.T.  
Eric J. Heyer, M.D., Ph.D.  
David Russell Hillman, M.D.  
Luzius B. Hiltbrand, M.D.  
Bradley J. Hindman, M.D.  
Yoshihiro Hirabayashi, M.D.  
Eldad A. Hod, M.D.  
Andreas Hoefl, M.D., Ph.D.  
Alexander Hoetzel, M.D.  
George M. Hoffman, M.D.  
Kirk Hogan, M.D.  
Charles W. Hogue, Jr., M.D.  
Rolf Holm-Knudsen, M.D.  
Ulrike Holzinger, M.D.  
Patrick Honoré, M.D.  
Harriet W. Hopf, M.D.  
Philip M. Hopkins, M.B., B.S., M.D.,  
F.R.C.A.  
Anthony G. Hudetz, D.B.M., Ph.D.  
Robert W. Hurley, M.D., Ph.D.  
Harald Ihmsen, Ph.D.  
Brian Michael Ilfeld, M.D., M.S.  
Charles Inturrisi, Ph.D.  
Masahiro Irifune, D.D.S., Ph.D.  
Teruhiko Ishikawa, M.D.  
Samir Jaber, M.D., Ph.D.  
Yves Jammes, M.D., D.Sc.  
Vesna Jevtovic-Todorovic, M.D.,  
Ph.D., M.B.A.  
Ru-Rong Ji, Ph.D.  
Yandong Jiang, M.D., Ph.D.  
Steven L. Jinks, Ph.D.  
Roger A. Johns, M.D.  
Ken B. Johnson, M.D.  
Denis Jordan, Ph.D.  
Girish P. Joshi, M.D., M.B.B.S.,  
F.F.A.R.C.S.I.  
Bettina Jungwirth, M.D.  
Zeev N. Kain, M.D., M.B.A.  
Pierre Kalfon, M.D.  
Cor J. Kalkman, M.D., Ph.D.  
Suzanne Beth Karan, M.D.  
Gregory J. Kato, M.D.  
Masahiko Kawaguchi, M.D.  
Tomiei Kazama, M.D., Ph.D.  
Henrik Kehlet, M.D., Ph.D.  
Max B. Kelz, M.D., Ph.D.  
Evan D. Kharasch, M.D., Ph.D.  
Hee-Soo Kim, M.D., Ph.D.  
William R. Kimball, M.D., Ph.D.  
Tamara King, Ph.D.  
Eric Kipnis, M.D., Ph.D.  
Markus G. Klass, M.D., Ph.D.  
Wolfram T Knoefel, M.D.  
Mei-Chuan Ko, Ph.D.  
W. Andrew Kofke, M.D., M.B.A.  
Tatsuro Kohno, M.D., Ph.D.  
Aaron F. Kopman, M.D.  
Daryl J. Kor, M.D.  
Francis Wickham Kraemer, III, M.D.  
Jens William Krombach, M.D.  
Eiichi Kumamoto, Ph.D.  
Wai-Meng Kwok, Ph.D.  
Jörn Lötsch, M.D.  
Alfred Philip Lake, B.Sc., M.B.B.S.,  
F.F.A.R.C.S.  
Ruth Landau, M.D.  
Olivier Langeron, M.D., Ph.D.  
William R. Lariviere, Ph.D.  
Merlin D. Larson, M.D.  
Patricia M. Lavand'homme, M.D.,  
Ph.D.  
Yannick Le Manach, M.D.  
Patrick Lecomte, M.D.  
Jae-Woo Lee, M.D.  
Lorri A. Lee, M.D.  
Jean-Yves Lefrant, M.D., Ph.D.  
Hendrikus Lemmens, Ph.D., M.D.  
Jerrold Lerman, M.D., F.R.C.P.C.,  
F.A.N.Z.C.A.  
Jacqueline M. Leung, M.D., M.P.H.  
Jon Levine, M.D., Ph.D.  
Jerrold H. Levy, M.D., F.A.H.A.  
Richard Jonathan Levy, M.D.  
Cynthia A. Lien, M.D.  
Alan Light, Ph.D.  
Ronald S. Litman, D.O., F.A.A.P.  
Linda Liu, M.D.  
Spencer S. Liu, M.D.  
Andreas W. Loepke, M.D., Ph.D.  
Martin J. London, M.D.  
Ralph Lydic, Ph.D.  
Carl Lynch, III, M.D., Ph.D.  
Daqing Ma, M.D., Ph.D.  
Neil MacIntyre, M.D.  
Feroze Mahmood, M.D.  
Gerard Raymond Manecke, Jr., M.D.  
Patrick W. Mantyh, Ph.D., J.D.  
Jianren Mao, M.D., Ph.D.  
Edward R. Mariano, M.D.  
Klaus Markstaller, M.D., Ph.D.  
Thomas Jeffrey Martin, Ph.D.  
Klaus Martin, M.D.  
Elizabeth A. Martinez, M.D.  
Katherine T. Martucci, B.S.  
Edward Mascha, Ph.D.  
George Alexander Mashour, M.D.,  
Ph.D.  
Keira P. Mason, M.D.  
Kenichi Masui, M.D., Ph.D.  
Joseph P. Mathew, M.D.  
Hiroshi Matsuura, M.D.  
Jean-Xavier Mazoit, M.D., Ph.D.  
Jill M. Mhyre, M.D.  
Kenneth Miller, Ph.D.  
Neil Richard Miller, M.D.  
Timothy Miller, M.D.  
Kouichiro Minami, M.D.  
Serge Molliex, M.D., Ph.D.  
Terri G. Monk, M.D.  
David E. Moody, Ph.D.  
Phil G. Morgan, M.D.  
Jonathan Moss, M.D., Ph.D.  
Ange Mouithys-Mickalad, Ph.D.  
Jochen Daniel Muehlschlegel, M.D.,  
M.M.Sc.  
Michael F. Mulroy, M.D.  
John M. Murkin, M.D., F.R.C.P.C.  
Paul S. Myles, M.B.B.S., M.P.H.,  
M.D., F.F.A.R.C.S.I., F.A.N.Z.C.A.  
Peter Nagele, M.D., M.Sc.  
Mohamed Naguib, M.B., B.Ch.,  
M.Sc., M.D.  
Joseph M. Neal, M.D.  
Timothy J. Ness, M.D., Ph.D.  
Claus U. Niemann, M.D.  
Andrea Mary Nolan, Ph.D.  
Karine Nouette-Gaulain, M.D., Ph.D.  
Jutta Novalija, M.D., Ph.D.  
Ala Nozari, M.D., Ph.D.  
Yutaka Oda, M.D.  
Erik Olofsen, M.Sc.  
Gilles André Orliaguet, M.D., Ph.D.  
Craig M. Palmer, M.D.  
Peter H. Pan, M.D.  
Hui-Lin Pan, M.D., Ph.D.  
Benedikt H.J. Pannen, M.D.  
Kaushik Parthasarathi, Ph.D.  
Hemal H. Patel, Ph.D.  
Nimesh S. Patel, M.D.  
Andrew J. Patterson, M.D., Ph.D.  
Catherine Paugam-Burtz, M.D., Ph.D.  
Didier Payen, M.D., Ph.D.  
Robert A. Pearce, M.D., Ph.D.  
Rupert M. Pearce, M.B.B.S., M.D.  
Misha Perouansky, M.D.  
Tjorvi E. Perry, M.D., M.M.Sc.  
Antti Pertovaara, M.D., Ph.D.  
Christopher Michael Peters, Ph.D.  
Karin L. Petersen, M.D.  
Jean-Francois Pittet, M.D.  
Gilles Plourde, M.D., M.Sc.  
Don Poldermans, M.D., Ph.D.  
Frank Porreca, Ph.D.  
Jean-Charles Preiser, M.D., Ph.D.  
Antoine Pronovost, M.D., M.B.A.,  
F.R.C.P.C.  
Kane O. Pryor, M.D.  
Feng Qin, Ph.D.  
N.J. Harold Raat, Ph.D.  
Douglas E. Raines, M.D.  
Srinivasa N. Raja, M.D.  
Satya Krishna Ramachandran, M.D.,  
F.R.C.A.  
Jacob Raphael, M.D.  
Lars S. Rasmussen, M.D., Ph.D.

- Richard Rauck, M.D.  
 Mathieu Raux, M.D., Ph.D.  
 Mario J. Rebecchi, Ph.D.  
 David L. Reich, M.D.  
 Elizabeth A. Repasky, Ph.D.  
 Philippe Richebé, M.D., Ph.D.  
 Bernhard J. Riedel, M.D.  
 Matthias L. Riess, M.D., Ph.D.  
 Ann Rigby-Jones, Ph.D.  
 Jacques Ripart, M.D., Ph.D.  
 Cyril Rivat, Ph.D.  
 Olivier Rixe, M.D., Ph.D.  
 Claudia S. Robertson, M.D.  
 Mark D. Rollins, M.D., Ph.D.  
 E. Alfonso Romero-Sandoval, M.D., Ph.D.  
 Carl E. Rosow, M.D., Ph.D.  
 Steven Roth, M.D.  
 Jean-Jacques Rouby, M.D., Ph.D.  
 Rob J. Roy, D.Eng.Sc., M.D.  
 Sabita Roy, Ph.D.  
 Colin F. Royse, M.B.B.S., M.D., F.A.N.Z.C.A.  
 James A. Russell, M.D.  
 M. Ramez Salem, M.D.  
 Jeffrey W. Sall, M.D., Ph.D.  
 Warren S. Sandberg, M.D., Ph.D.  
 Robert D. Sanders, B.Sc., M.B.B.S., F.R.C.A.  
 Jiro Sato, M.D.  
 Michael Schaefer, M.D.  
 Thomas Schilling, M.D., Ph.D., D.E.A.A.  
 Martin Schmelz, M.D.  
 Ulrich H. Schmidt, M.D.  
 Gerhard Schneider, M.D.  
 Marcus J. Schultz, M.D., Ph.D., F.C.C.P.  
 Mark Anthony Schumacher, Ph.D., M.D.  
 Martin Schuster, M.D., M.A.  
 Stephan K. W. Schwarz, M.D., Ph.D., F.R.C.P.C.  
 Phillip E. Scuderi, M.D.  
 John Sear, M.B.B.S., Ph.D.  
 William Seeley, M.D.  
 Eva Sellden, M.D., Ph.D.  
 Frédérique S. Servin, M.D.  
 Steven L. Shafer, M.D.  
 Muhammad I. Shaikh, M.D.  
 Tait Shanafelt, M.D.  
 Aryeh Shander, M.D., F.C.C.M., F.C.C.P.  
 Andrew D. Shaw, M.D.  
 Stanton Shernan, M.D.  
 Timothy G. Short, M.D.  
 Jeffrey H. Silverstein, M.D.  
 Nikolaos J. Skubas, M.D.  
 Jamie W. Sleigh, M.D.  
 Richard M. Smiley, M.D., Ph.D.  
 J. Robert Sneyd, M.D., F.R.C.A.  
 Gabriel Snyder, M.D.  
 Mieke Soens, M.D.  
 James Michael Sonner, M.D.  
 Sulpicio G. Soriano, M.D.  
 Linda S. Sorkin, Ph.D.  
 Donat Rudolf Spahn, M.D., F.R.C.A.  
 Christina Marie Spofford, M.D., Ph.D.  
 Jon Eric Sprague, Ph.D.  
 Robin A. Stackhouse, M.D.  
 Anna Stadnicka, Ph.D.  
 Randolph H. Steadman, M.D.  
 Joseph Henry Steinbach, Ph.D.  
 Markus Florian Stevens, M.D., D.E.A.A., D.E.S.R.A.  
 Gudrun Stockmanns, Ph.D.  
 Greg Stratmann, M.D., Ph.D.  
 Scott C. Streckenbach, M.D.  
 Robert A. Strickland, M.D.  
 David P. Strum, M.D., F.R.C.P.C.  
 Michel M. R. F. Struys, M.D., Ph.D.  
 Audun Stubhaug, M.D., Ph.D.  
 Cheryl Stucky, Ph.D.  
 Balachundhar Subramaniam, M.B.B.S., M.D., M.P.H.  
 Tsutomu Suzuki, Ph.D.  
 Madhav Swaminathan, M.D., F.A.S.E., F.A.H.A.  
 Francois Sztark, M.D., Ph.D.  
 Yugo Tagaito, M.D.  
 Daniel Talmor, M.D., M.P.H.  
 Katsuya Tanaka, M.D.  
 Yuan-Xiang Tao, M.D., Ph.D.  
 Richard Teplick, M.D.  
 Niccolo Terrando, Ph.D.  
 Annemarie Thompson, M.D.  
 Marianne Thoresen, M.D, Ph.D.  
 Joseph Drew Tobias, M.D.  
 Michael M. Todd, M.D.  
 Makoto Tominaga, M.D., Ph.D.  
 Ashley Tonidandel, M.D.  
 Richard J. Traub, Ph.D.  
 Kevin K. Tremper, Ph.D., M.D.  
 Masahiko Tsuchiya, Ph.D., M.D.  
 Ban C. H. Tsui, M.Sc., M.D.  
 Shieak Tzeng, M.D., Ph.D.  
 Richard Neil Upton, B.Sc., Ph.D.  
 Bernd W. Urban, Ph.D.  
 William F. Urmev, M.D.  
 Jan van der Linden, M.D., Ph.D.  
 Philippe J. Van der Linden, M.D., Ph.D.  
 Eveline L.A. van Dorp, M.D.  
 Jan Van Zundert, M.D., Ph.D., F.I.P.P.  
 Susan A. Vassallo, M.D.  
 Monica Shanta Vavilala, M.D.  
 Lionel J. Velly, M.D.  
 Robert A. Veselis, M.D.  
 Marcos Francisco Vidal Melo, M.D., Ph.D.  
 Michael M. Vigoda, M.D.  
 Benoit Vivien, M.D., Ph.D.  
 Jaap Vuyk, M.D., Ph.D.  
 Gebhard Wagener, M.D.  
 Arthur W. Wallace, M.D., Ph.D.  
 Timothy S. Walsh, M.D.  
 Frank Wappler, M.D.  
 Mark A. Warner, M.D.  
 David O. Warner, M.D.  
 C. Thomas Wass, M.D.  
 Mehernoor F. Watcha, M.D.  
 Jonathan H. Waters, M.D.  
 Nina C. Weber, Ph.D.  
 Guy L. Weinberg, M.D.  
 Richard B. Weiskopf, M.D.  
 Dwayne R. Westenskow, Ph.D.  
 Donald B. White, Ph.D.  
 Paul F. White, Ph.D., M.D., F.A.N.Z.C.A.  
 Harvey J. Woehlck, M.D.  
 Andrew Wolf, M.D., F.R.C.A.  
 Zhongcong Xie, M.D., Ph.D.  
 Jay Yang, M.D., Ph.D.  
 Mark Yeager, M.D.  
 Daniel Dante Yeh, M.D.  
 Sloan C Youngblood, M.D.  
 Peter K. Zahn, M.D.  
 Michael Zaugg, M.D., M.B.A., F.R.C.P.C.  
 Haibo Zhang, M.D., Ph.D.  
 Li-Ming Zhang, M.D.  
 Jie Zhou, M.D., M.B.A., M.S.  
 Mark H. Zornow, M.D.
